# Supplementary material for: Enhanced electrocatalytic H2S splitting on a multiwalled carbon nanotubes-graphene oxide nanocomposite
Source: Royal Society of Chemistry journal article supplement (doi:10.1039/d1nj00432h), 2021-01-01
Supplement: d1nj00432h1.pdf [file d1nj00432h1.pdf]

## Supporting Information:

### **Enhanced Electrocatalytic H<sub>2</sub>S Splitting on Multiwalled Carbon Nanotubes-Graphene Oxide Nanocomposite**

**Shankar S. Narwade, Shivsharan M. Mali, Akash K. Tapre and Bhaskar R. Sathe\***

*Department of Chemistry, Dr. Babasaheb Ambedkar Marathwada University,  
Aurangabad- 431 004 (MS) India.*

***Email:** bhaskarsathe@gamil.com; bsathe.chemistry@bamu.ac.in  
Telephone: +91-8275306471*

#### **S1: Raman spectroscopy:**

Raman spectroscopy has been widely used to know the extent of functionalization of carbon based nanomaterials. In Fig. S1, the electronic structure of the as-prepared catalysts is revealed through the characteristic peaks at 1342 cm<sup>-1</sup> (the D band indicating disordered sp<sup>2</sup> hybridized carbons of GO) and 1559 cm<sup>-1</sup> (the G band corresponding to the tangential stretching vibration of the GO hexagonal ring). The Raman data of GO shows D and bands at 1339 cm<sup>-1</sup> and 1554 cm<sup>-1</sup> respectively, whereas, for O-MWCNTs is D band 1389 cm<sup>-1</sup> and G band is 1581 cm<sup>-1</sup>. All the carbon based electrocatalytic system shows a stronger D band compared to G band, which could be due to effective oxidation of both graphene and MWCNTs. Moreover, the intensity ratio of the D and G bands ( $I_D/I_G$ ), which is the quantitative measure for edge plane exposure and is commonly used as a quantization standard for doping and chemical modification, has a positive relationship with the content of structural heterogeneity in MWCNTs@GO, GO and O-MWCNTs is 0.860, 0.861 and 0.878 cm<sup>-1</sup> respectively. This further proves that the introduction of short O-MWCNTs with lots of GO edges can give rise to enrich the types of catalytic active sites. The results of elemental analysis and Raman spectra demonstrate O-MWCNTs can be doped into the defect structural sites to become substitutive GO to lessen the number of structural defects. In addition, the introduction of O-MWCNTs into the GO contributes to the shift of the G band towards the low frequency region, which is in good agreement with earlier reports from literature.

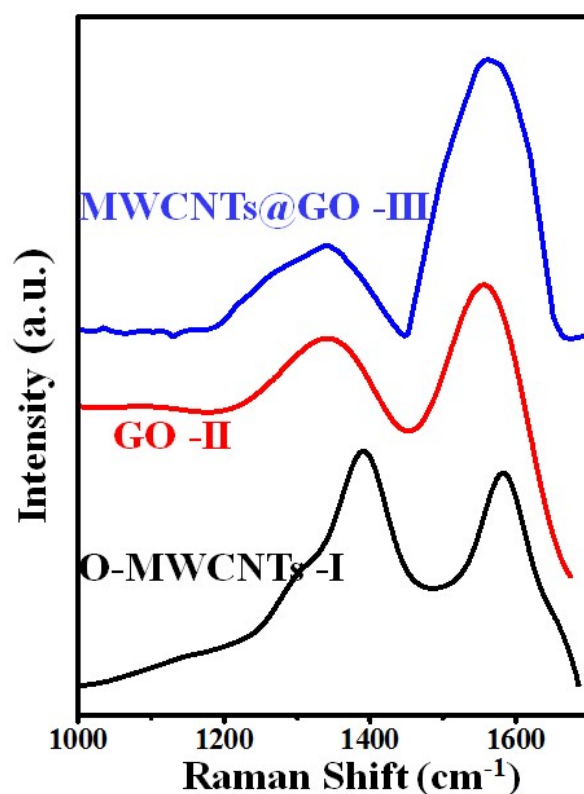

**Figure S1.** Superimposed Raman spectra of (I) O-MWCNTs, (II) GO and (III) MWCNTs@GO respectively.

### Referance

1. Y. Wang, L. Zhou, S. Wang, J. Li, J. Tang, S. Wang and Y. Wang, *RSC Adv.*, 2016, 6, 69815–69821.
2. N. Wu, X. She, D. Yang, X. Wu, F. Su and Y. Chen, *J. Mater. Chem.*, 2012, 22, 17254–17261.
3. H. Abdali and A. Ajji, *Polymers*, 2017, 9, 453.

**Table S1.** Current density of hydrogen evolution reaction for MWCNTs@GO compared with other catalysts used in the previous works and related potential catalysts at a given potential from literature. It includes precious materials like Pt/C, metallic sulfides, metallic oxides, metal organic compound and carbon materials are demonstrated for H<sub>2</sub> production from H<sub>2</sub>S and are summarized herein. As shown in the Table S1, the MWCNTs@GO catalysts displayed the superior activity than any of the contrast catalysts mentioned in the previous works.

| Sr. No. | Nanocomposites                 | Onset Potential (V) | Reference |
|---------|--------------------------------|---------------------|-----------|
| 1       | 40% Pt/C                       | 0.3                 | 1         |
| 2       | CuS                            | 0.3                 | 2         |
| 3       | CoS                            | 0.3                 | 3         |
| 4       | MoS <sub>2</sub>               | 0.3                 | 4         |
| 5       | Fe <sub>3</sub> O <sub>4</sub> | 0.3                 | 5         |
| 6       | Ni@NGs                         | 0.3                 | 6         |
| 7       | Co@NGs                         | 0.3                 | 6         |
| 8       | CoNi@NGs                       | 0.3                 | 6         |
| 9       | Graphite                       | 0.3                 | 7         |
| 10      | Graphene                       | 0.3                 | 7         |
| 11      | CNTs                           | 0.3                 | 8         |
| 12      | MWCNTs@GO/GCE                  | -0.5                | This Work |

## Referances

1. K. Petrov and S. Srinivasan, *Int. J. Hydrogen Energy*, 1996, **21**, 163-169.
2. G. Hodes, J. Manassen and D. Cahen, *J. Electrochem. Soc.*, 1980, **127**, 544-549.
3. L. Su, A. F. Badel, C. Cao, J. J. Hinricher and F. R. Brushett, *Industrial & Engineering Chemistry Research*, 2017, **56**, 9783-9792
4. A. E. Sanl, A. Aytaç and M. Mat, *International Journal of Hydrogen Energy*, 2014, **39**, 9221-9229.
5. S. Jung, C. C. L. McCrory, I. M. Ferrer, J. C. Peters and T. F. Jaramillo, *J. Mater. Chem. A*, 2016, **4**, 3068-3076.
6. M. Zhang, J. Guan, Y. Tu, Shiming Chen, Yong Wang, S. Wang, L. Yu, C. Ma, D. Deng, and X. Bao, *Energy Environ. Sci.*, 2020, **13**, 119-126
7. J. P. Perdew, K. Burke and M. Ernzerhof, *Phys. Rev. Lett.*, 1996, **77**, 3865-3868.
8. B. G. Ateya, F. M. Al-Kharafi, R. M. Abdallah and A. S. Al-Azab, *Journal of Applied Electrochemistry*, 2005, **35**, 297-303.
